# Supplementary material
Source: publisher figshare collection journal article supplement (https://karger.figshare.com/ndownloader/files/15592397)
Supplement: Supplementary file 1 [file 15592397]

## SUPPLEMENTAL MATERIAL

Supplemental Table 1. Baseline characteristics of the study population stratified by palliative care use. Numbers given are n (%) unless stated otherwise. AMA: Against medical advice; APR-DRG: All patient refined diagnosis-related group; CCI: Charlson Comorbidity Index; LOS: Length of stay; PI: Pacific Islander; SNF: Skilled Nursing Facility.

| Characteristic                   | Palliative Care<br>n=3,354 (12.5%) | No Palliative Care<br>n=23,437 (87.5%) | p-value |
|----------------------------------|------------------------------------|----------------------------------------|---------|
| <b>Age</b> – years: median (IQR) | 78 (67-85)                         | 70 (57-80)                             | <0.001  |
| <b>Female</b>                    | 1,844 (55.0)                       | 11,365 (48.5%)                         | <0.001  |
| <b>Race/Ethnicity</b>            |                                    |                                        | <0.001  |
| White                            | 2,479 (73.9)                       | 14,584 (62.2)                          |         |
| Black                            | 417 (12.4)                         | 4,491 (19.2)                           |         |
| Hispanic                         | 205 (6.1)                          | 2,263 (9.7)                            |         |
| Asian/PI                         | 139 (4.1)                          | 1,160 (4.9)                            |         |
| Other                            | 114 (3.4)                          | 939 (4.0)                              |         |
| All ethnic minorities            | 875 (26.1)                         | 8,853 (37.8)                           |         |
| <b>Health Insurance</b>          |                                    |                                        | <0.001  |
| Medicare                         | 2,345 (69.9)                       | 13,516 (57.7)                          |         |
| Medicaid                         | 182 (5.4)                          | 2,468 (10.5)                           |         |
| Private Insurance                | 551 (16.4)                         | 5,007 (21.4)                           |         |
| Self-pay/other                   | 276 (8.2)                          | 2,446 (10.4)                           |         |
| <b>Modified CCI</b>              |                                    |                                        | 0.018   |
| 0                                | 1,526 (45.5)                       | 10,871 (46.4)                          |         |
| 1                                | 1,055 (31.5)                       | 7,421 (31.7)                           |         |
| 2                                | 439 (13.1)                         | 3,190 (13.6)                           |         |
| ≥3                               | 334 (10.0)                         | 1,955 (8.3)                            |         |
| <b>APR-DRG</b>                   |                                    |                                        | <0.001  |
| Minor                            | 141 (4.2)                          | 1,658 (7.1)                            |         |
| Moderate                         | 581 (17.3)                         | 7,073 (30.2)                           |         |
| Major                            | 1,383 (41.2)                       | 8,846 (37.7)                           |         |
| Extreme                          | 1,249 (37.2)                       | 5,860 (25.0)                           |         |
| <b>LOS</b> – days: median (IQR)  | 3 (1-6)                            | 5 (3-10)                               | <0.001  |
| <b>Discharge Disposition</b>     |                                    |                                        | <0.001  |
| Home/Self-care                   | 56 (1.7)                           | 5,134 (21.9)                           |         |

|                                            |              |               |  |
|--------------------------------------------|--------------|---------------|--|
| Short-term hospital/<br>Rehab facility/SNF | 272 (8.1)    | 10,881 (46.4) |  |
| Home health care                           | 41 (1.2)     | 1,728 (7.4)   |  |
| Home hospice                               | 136 (4.1)    | 194 (0.8)     |  |
| Inpatient hospice                          | 459 (13.7)   | 788 (3.4)     |  |
| Left AMA                                   | ≤10 (0.0)*   | 99 (0.4)      |  |
| Discharged alive,<br>destination unknown   | 22 (0.7)     | 42 (0.2)      |  |
| In-hospital mortality                      | 2,366 (70.6) | 4,561 (19.5)  |  |

\*The HCUP data user agreement precludes reporting individual cell counts ≤10.

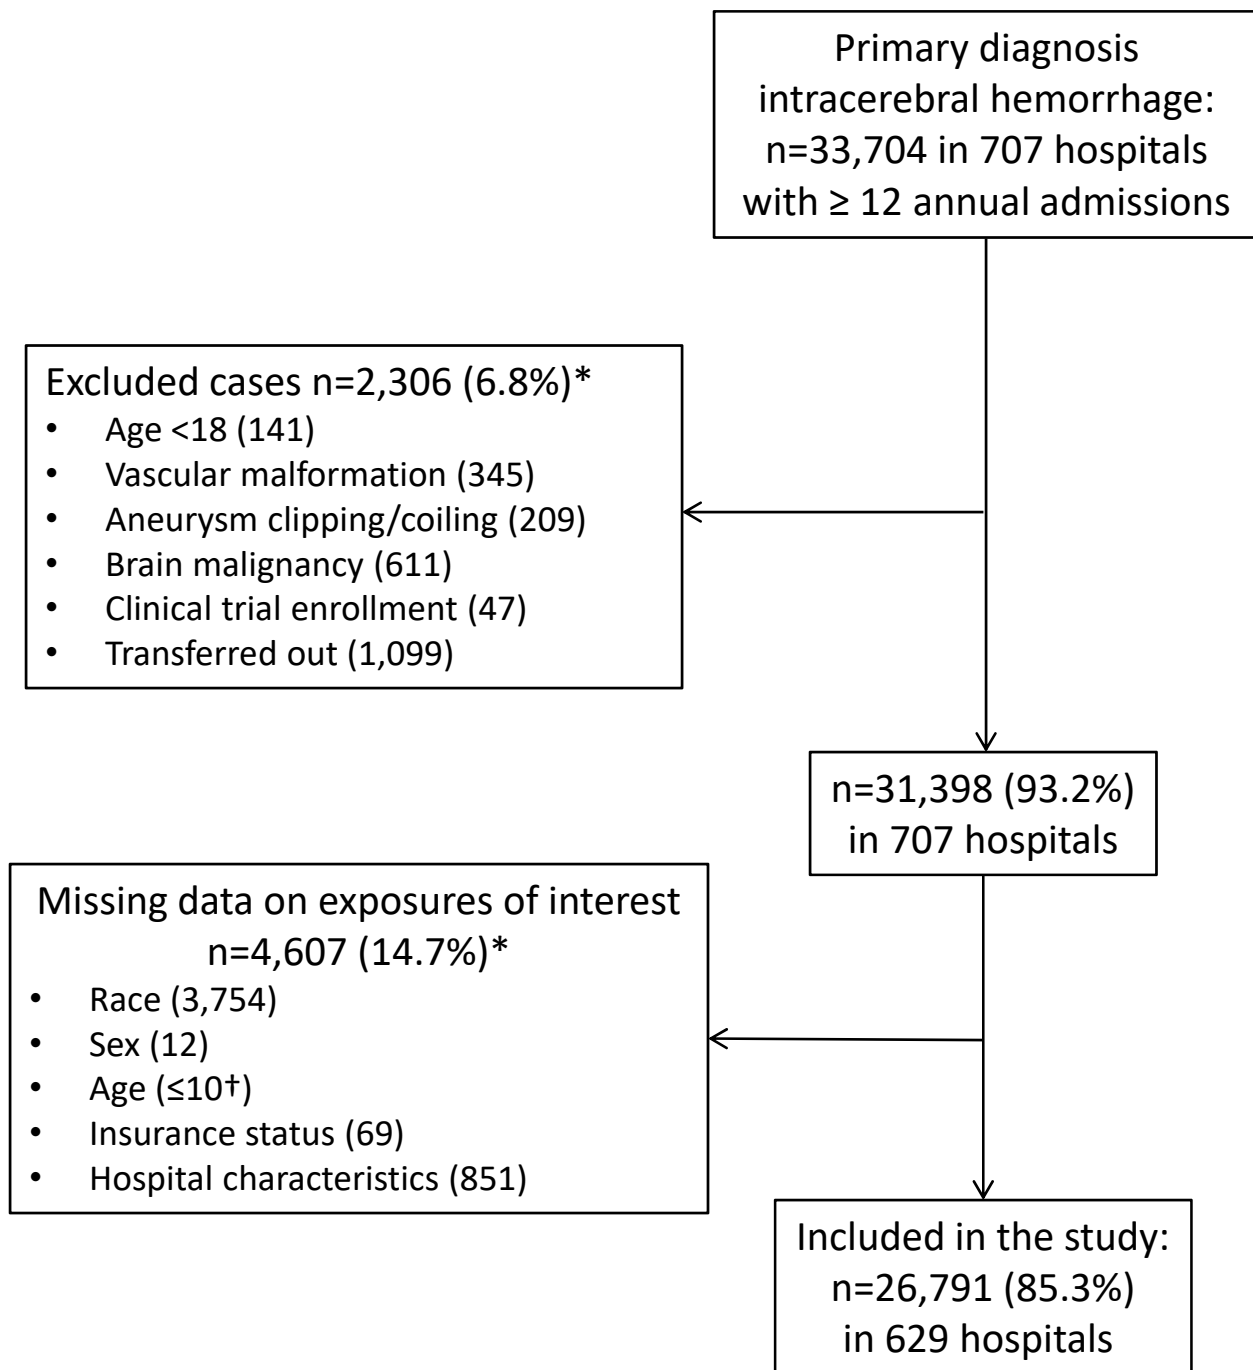

**Supplemental Figure 1**

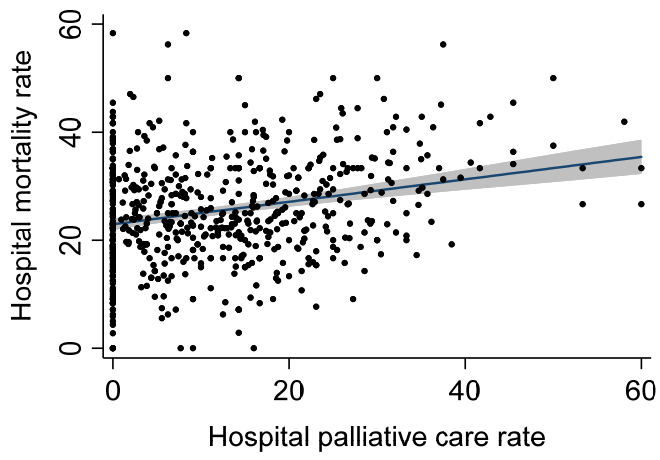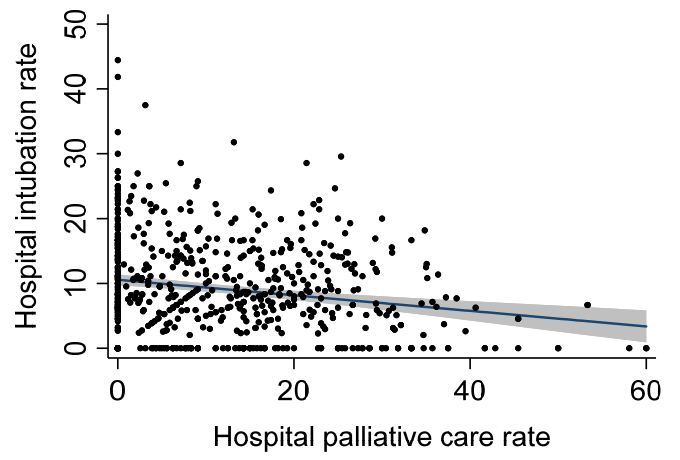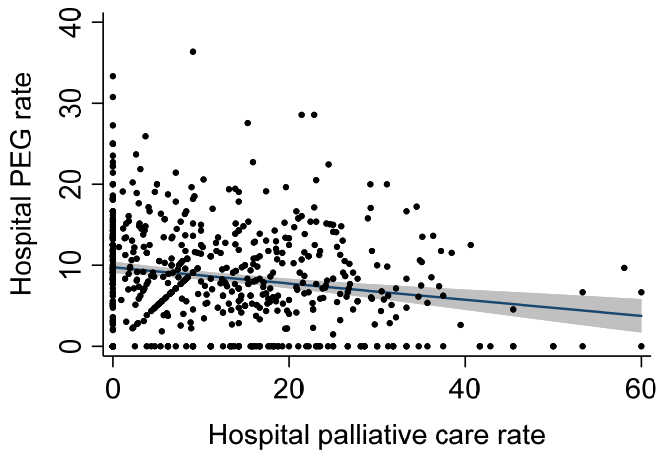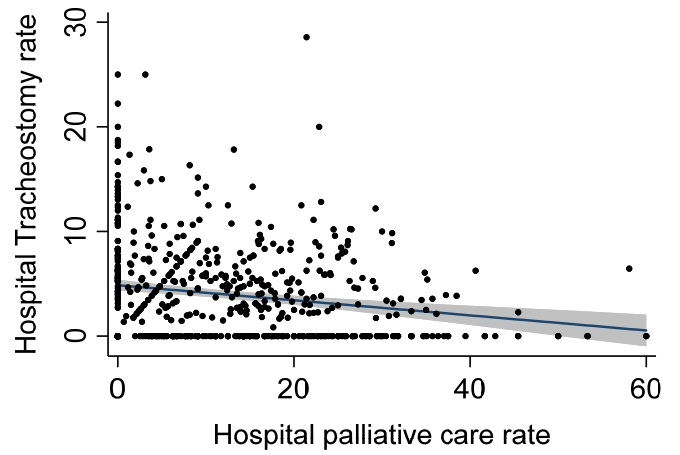

**Supplemental Figure 2**

## Supplemental Figure Legend

Supplemental Figure 1. Flow diagram indicating case selection. \*Categories are not mutually exclusive; †The HCUP data user agreement precludes reporting individual cell counts  $\leq 10$ .

Supplemental Figure 2. Scatter plots showing the correlation between hospital palliative care use and inpatient mortality rate (upper left), hospital rate of prolonged intubation (upper right), hospital PEG rate (lower left), and hospital tracheostomy rate (lower right). One hospital with 100% palliative care rate was excluded for this analysis. Each dot represents one hospital. An overlaying line of best fit with 95% confidence interval is shown.
